# Supplementary material for: Nanozymes with Peroxidase-like Activity for Ferroptosis-Driven Biocatalytic Nanotherapeutics of Glioblastoma Cancer: 2D and 3D Spheroids Models
Source: MDPI journal article supplement (doi:10.3390/pharmaceutics15061702), 2023-06-10
Supplement: s1 [file s1]

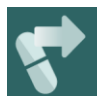

## Tables

**Table S1.** Crystallite size based on XRD data (Scherrer's Equation) (average  $\pm$  standard deviation).

| Sample    | Crystallite size (nm) |               |
|-----------|-----------------------|---------------|
|           | Plane (311)           | Plane (220)   |
| MION      | $6.4 \pm 0.6$         | $6.4 \pm 0.3$ |
| Co10-MION | $6.6 \pm 0.9$         | $6.5 \pm 0.5$ |
| Co20-MION | $6.5 \pm 1.0$         | $7.3 \pm 0.2$ |
| Co40-MION | $6.1 \pm 0.1$         | $5.4 \pm 0.4$ |

## Figures

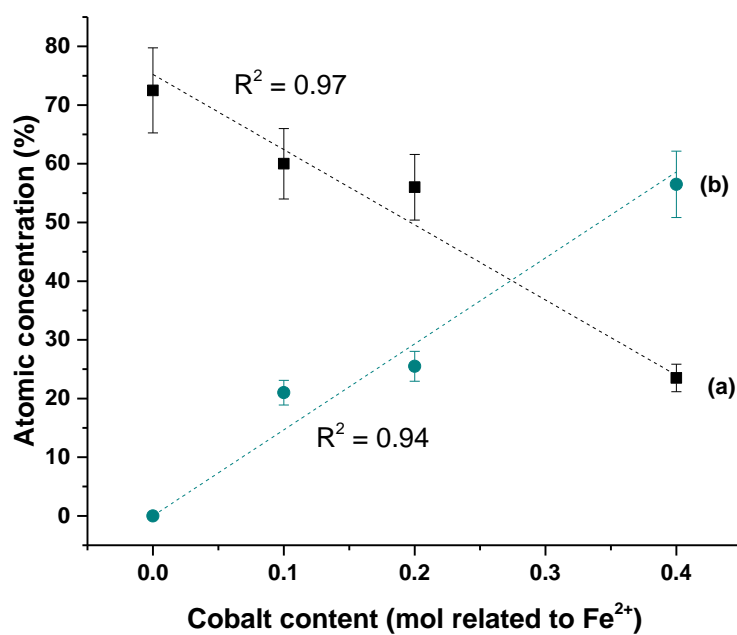

Figure S1. Evolution of atomic concentration of (a)  $\text{Fe}^{2+}$  and (b)  $\text{Co}^{2+}$  with increasing cobalt doping content.

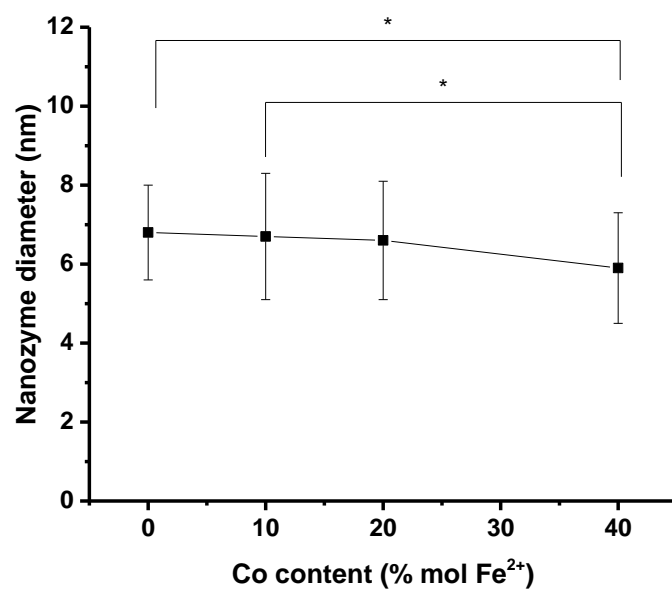

Figure S2. Diameter of nanozyme inorganic core as a function of Co content.

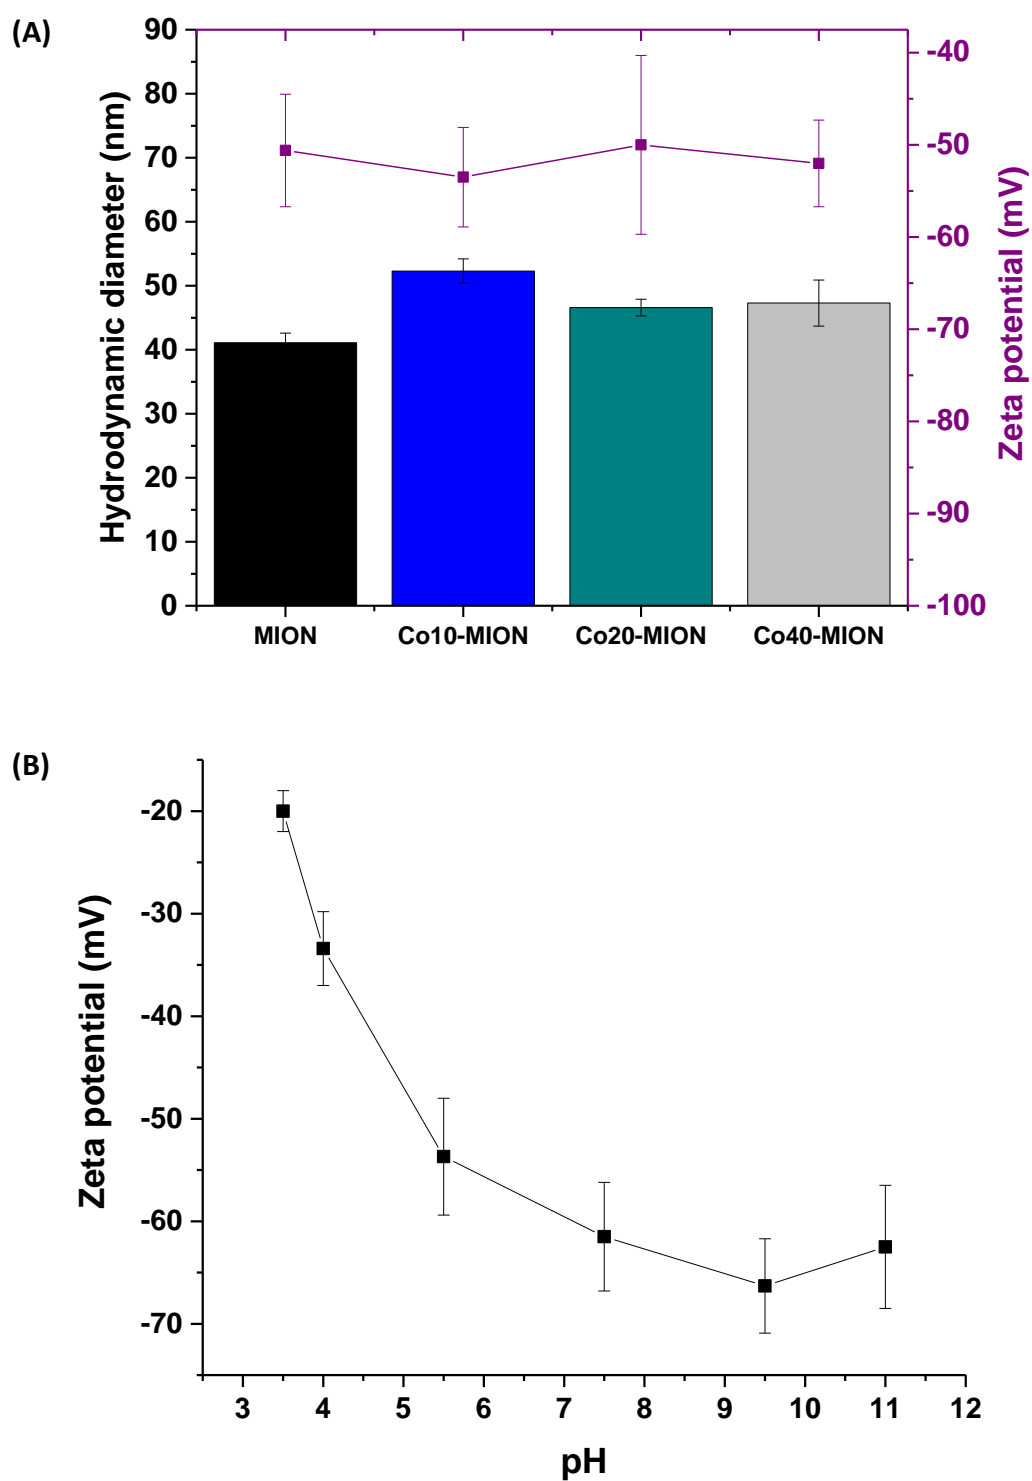

**Figure S3.** (A) Hydrodynamic diameter (columns) and Zeta potential (symbols/line) of nanozymes (average  $\pm$  standard deviation,  $n \geq 3$ ). (B) Zeta potential values of CMC as a function of pH (average  $\pm$  standard deviation,  $n \geq 3$ ).

- Control    
  + Control    
  MION    
  Co10-MION    
  Co20-MION    
  Co40-MION

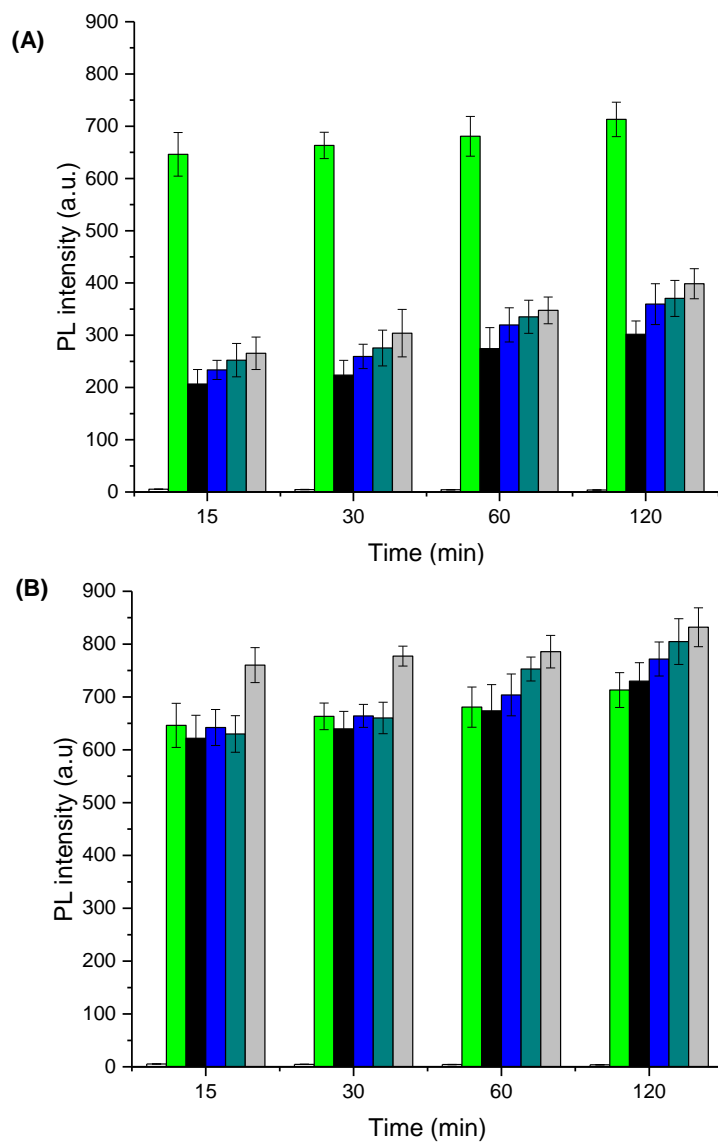

**Figure S4.** Effect of cobalt content on ROS accumulation in GBM cells at 15 min, 30 min, 60 min, and 120 min after contact with nanozymes at concentrations of (A)  $0.6 \mu\text{g mL}^{-1}$  and (B)  $6 \mu\text{g mL}^{-1}$  of Fe+Co compared to DCF+cells ("-"negative control) and TBHP (positive "+" control). (average  $\pm$  standard deviation,  $n=5$ ).
